# Supplementary material for: Vacuum and sonication treatment enables efficient transient gene expression in various monocot and eudicot plant seedlings
Source: Research Square preprint supplement (doi:10.21203/rs.3.rs-6304532/v1), 2025-08-27
Supplement: Supplementary file 1 [file 0b22e9309c48f3fe176223e7.xlsx]

## Sheet: Supplementary Table 1
Supplementary Table 2. Overview of seedling age and transformation conditions in all species
Efficient transient gene expression in various monocot and eudicot plant seedlings
Eugene Li1,2, Yuan Geng1,2, Tuyako R. Khristoforova2, Yunqing Wang3, Jolie Jones2, Gozde S. Demirer2,#
1Authors contributed equally
2Chemistry and Chemical Engineering Division, California Institute of Technology, Pasadena, CA, USA 91125
3Biology and Biological Engineering Division, California Institute of Technology, Pasadena, CA, USA 91125
#corresponding author: gdemirer@caltech.edu
YPET expression construct
Plasmid name	Backbone and Inserts	Description	Origin	Addgene ID
pYG18	pCk2_uLIR	The upstream component of a geminiviral replicon	This study, the uLIR DNA fragment was synthesized based on the sequence retrieved from Baltes et al., 2014	236636
pYG29	pCk3_pCmYLCV_YPET_tHSP	YPET transcription unit	This study	236637
pYG13	pCK4_SIR_RepA_dLIR (SRL)	The downstream component of a geminiviral replicon	This study, the SRL DNA fragment was synthesized based on the sequence retrieved from Baltes et al., 2014	236638
pYG34	pCsB_LIR_pCmYLCV_YPET_tHSP_SRL	YPET expression construct built based on pYG13, pYG18 and pYG29	This study	236639
NRP Nitrate Sensor
Plasmid name	Backbone and Inserts	Description	Origin	Addgene ID
pQQ7	pCk1_Pro-AtOLE1_5U-AtOLE1_CDATOLE1_CT-RFP_Ter-OLE1	Transcriptional unit Fast-Red	https://doi.org/10.1111/j.1365-313X.2009.04060.x	236640
pQQ128	pCk3_R_pNOS_NLuc[ST-LS1 intron2_v3]_Tnos	Transcriptional unit NanoLuc luciferase with Nopaline Synthase promoter and terminator, reverse orientation	https://journals.plos.org/plosone/article?id=10.1371/journal.pone.0227477 & https://doi.org/10.1021/acssynbio.1c00248 & https://doi.org/10.1007/s004380000433	236641
pQQ132	pCk2_F_AtNRP_GeNL[ST-LS1 intron2_v3]_THsp18	Transcriptional unit Green Enhanced Nano-lantern with Nitrate-Regulated Promoter and Arabidopsis heat shock protein 18.2 terminator	https://journals.plos.org/plosone/article?id=10.1371/journal.pone.0227477 & https://doi.org/10.1021/acssynbio.1c00248 & https://doi.org/10.1007/s004380000433	236642
pQQ137	pCsC_F_pOlesin_FASTred+F_AtNRP_GeNL[ST-LS1 intron2_v3]_THsp18+R_pNOS_NLuc[ST-LS1 intron2_v3]_Tnos	NRP nitrate sensor built based on pQQ7, pQQ128, and pQQ132	This study	236643

## Sheet: Supplementary Table 2
Supplementary Table 2. Overview of seedling age and transformation conditions in all species
Efficient transient gene expression in various monocot and eudicot plant seedlings
Eugene Li1,2, Yuan Geng1,2, Tuyako R. Khristoforova2, Yunqing Wang3, Jolie Jones2, Gozde S. Demirer2,#
1Authors contributed equally
2Chemistry and Chemical Engineering Division, California Institute of Technology, Pasadena, CA, USA 91125
3Biology and Biological Engineering Division, California Institute of Technology, Pasadena, CA, USA 91125
#corresponding author: gdemirer@caltech.edu
Species name	Plant age (days after sowing)	A. tumefaciens strain and concentration	Optimized treatments at the beginning of co-cultivation	Co-cultivation duration
Arabidopsis thaliana	8*	GV3101, OD600 = 0.14	20 s sonication + 3x vacuum	2 days
Solanum lycopersicum	11	GV3101, OD600 = 0.4	30 s sonication + 3x vacuum	2 days
Brassica rapa	10*	GV3101, OD600 = 0.4	15 s sonication + 3x vacuum	1 day
Medicago sativa	10	GV3101, OD600 = 0.4	45 s sonication + 4x vacuum	2 days
Triticum aestivum	7*	AGL1, OD600 = 0.4	30 s sonication + 4x vacuum	2 days
Setaria italica	9	AGL1, OD600 = 0.4	30 s sonication + 4x vacuum	2 days
Panicum virgatum	9	AGL1, OD600 = 0.4	30 s sonication + 4x vacuum	2 days
*seeds were subjected to a 2-day cold treatment to synchronize germination

## Sheet: Supplementary Table 3
Supplementary Table 2. Overview of seedling age and transformation conditions in all species
Efficient transient gene expression in various monocot and eudicot plant seedlings
Eugene Li1,2, Yuan Geng1,2, Tuyako R. Khristoforova2, Yunqing Wang3, Jolie Jones2, Gozde S. Demirer2,#
1Authors contributed equally
2Chemistry and Chemical Engineering Division, California Institute of Technology, Pasadena, CA, USA 91125
3Biology and Biological Engineering Division, California Institute of Technology, Pasadena, CA, USA 91125
#corresponding author: gdemirer@caltech.edu
Element	Primer name	Sequence	Description
EF1⍺	EF1⍺-qf	agatcaacgagcccaagagg	qpcr primers for EF1⍺
	EF1⍺-qr	caccgttccaataccaccaatc	qpcr primers for EF1⍺
YPET	YPET-qf1	caaccactacctgagctaccag	qpcr primers for YPET
	YPET-qf2	agaacacccccatcggcg	qpcr primers for YPET
ADH	ADH1-qf	gaatcgctggtgcttctagg	qpcr primers for ADH
	ADH1-qr	ctcagcgatcacctgttgaa	qpcr primers for ADH
