# Supplementary material for: Vacuum and sonication treatment enables efficient transient gene expression in various monocot and eudicot plant seedlings
Source: Research Square preprint supplement (doi:10.21203/rs.3.rs-6304532/v1), 2025-08-27
Supplement: Supplementary file 3 [file 87128a47ea54563f79d71036.xlsx]

## Sheet: Fig1
Liquid MS	Solid MS	Vac1X	Vac3X	Son	Son&Vac3X
4.61427	2.54516	2.12411	9.54925	70.1163	65.6937
0.8163	2.00634	2.11835	8.73083	50.6156	38.3488
1.64465	4.48892	4.46783	12.0531	33.8431	43.9534
Table Analyzed	Fig1 without treatment	Table Analyzed	Fig1 with vactreatment	Table Analyzed	Fig1 with sontreatment
Column B	Solid MS	Column C	Vac3X	Column B	Son&Vac3X
vs.	vs.	vs.	vs.	vs.	vs.
Column A	Liquid MS	Column B	Vac1X	Column A	Son
Unpaired t test		Unpaired t test		Unpaired t test
P value	0.6592	P value	0.0047	P value	0.8779
P value summary	ns	P value summary	**	P value summary	ns
Significantly different (P < 0.05)?	No	Significantly different (P < 0.05)?	Yes	Significantly different (P < 0.05)?	No
One- or two-tailed P value?	Two-tailed	One- or two-tailed P value?	Two-tailed	One- or two-tailed P value?	Two-tailed
t, df	t=0.4755, df=4	t, df	t=5.679, df=4	t, df	t=0.1637, df=4
How big is the difference?		How big is the difference?		How big is the difference?
Mean of column A	2.358	Mean of column B	2.903	Mean of column A	51.52
Mean of column B	3.013	Mean of column C	10.11	Mean of column B	49.33
Difference between means (B - A) ± SEM	0.6551 ± 1.378	Difference between means (C - B) ± SEM	7.208 ± 1.269	Difference between means (B - A) ± SEM	-2.193 ± 13.39
95% confidence interval	-3.170 to 4.480	95% confidence interval	3.684 to 10.73	95% confidence interval	-39.38 to 34.99
R squared (eta squared)	0.0535	R squared (eta squared)	0.8897	R squared (eta squared)	0.006658
F test to compare variances		F test to compare variances		F test to compare variances
F, DFn, Dfd	2.339, 2, 2	F, DFn, Dfd	1.632, 2, 2	F, DFn, Dfd	1.580, 2, 2
P value	0.599	P value	0.7598	P value	0.7753
P value summary	ns	P value summary	ns	P value summary	ns
Significantly different (P < 0.05)?	No	Significantly different (P < 0.05)?	No	Significantly different (P < 0.05)?	No
Data analyzed		Data analyzed		Data analyzed
Sample size, column A	3	Sample size, column B	3	Sample size, column A	3
Sample size, column B	3	Sample size, column C	3	Sample size, column B	3

## Sheet: Fig2
VAST	AGROBEST	Fast-TrACC				VAST	AGROBEST	Fast-TrACC	Mock
28.6	2.2	3				0	0.15	0.17	0
25.3	1.1	1.3				0	0.25	0.18	0
33.7	0.8	2.7				0	0.14	0.24	0
19.5	0.3	3.8					0.19	0.1	0
Table Analyzed	YPET Time1					Table Analyzed	ADH Time1
Data sets analyzed	A-C					Data sets analyzed	A-D
ANOVA summary						ANOVA summary
F	66.75					F	24.9
P value	<0.0001					P value	<0.0001
P value summary	****					P value summary	****
Significant diff. among means (P < 0.05)?	Yes					Significant diff. among means (P < 0.05)?	Yes
R squared	0.9368					R squared	0.8716
Brown-Forsythe test						Brown-Forsythe test
F (DFn, DFd)	5.254 (2, 9)					F (DFn, DFd)	2.852 (3, 11)
P value	0.0308					P value	0.0861
P value summary	*					P value summary	ns
Are SDs significantly different (P < 0.05)?	Yes					Are SDs significantly different (P < 0.05)?	No
Bartlett's test						Bartlett's test
Bartlett's statistic (corrected)	11.33					Bartlett's statistic (corrected)
P value	0.0035					P value
P value summary	**					P value summary
Are SDs significantly different (P < 0.05)?	Yes					Are SDs significantly different (P < 0.05)?
ANOVA table	SS	DF	MS	F (DFn, DFd)	P value	ANOVA table	SS	DF	MS	F (DFn, DFd)	P value
Treatment (between columns)	1655	2	827.6	F (2, 9) = 66.75	P<0.0001	Treatment (between columns)	0.1178	3	0.03927	F (3, 11) = 24.90	P<0.0001
Residual (within columns)	111.6	9	12.4			Residual (within columns)	0.01735	11	0.001577
Total	1767	11				Total	0.1352	14
Data summary						Data summary
Number of treatments (columns)	3					Number of treatments (columns)	4
Number of values (total)	12					Number of values (total)	15

## Sheet: Fig3
VAST-C58C1	VAST-GV3101	AGROBEST-C58C1	Fast-TrACC-C58C1
177.359	294.224	91.567	63.399
328.077	113.894	14.59	38.856
263.323	164.953	26.047	59.177
174.904	238.355	24.28	62.798
Table Analyzed	VT2 YPET
Data sets analyzed	A-D
Distribution assumption	Normal (Gaussian)
ANOVA summary
F	12.23
P value	0.0006
P value summary	***
Significant diff. among means (P < 0.05)?	Yes
R squared	0.7536
Brown-Forsythe test
F (DFn, DFd)	4.191 (3, 12)
P value	0.0303
P value summary	*
Are SDs significantly different (P < 0.05)?	Yes
Bartlett's test
Bartlett's statistic (corrected)	7.916
P value	0.0478
P value summary	*
Are SDs significantly different (P < 0.05)?	Yes
ANOVA table	SS	DF	MS	F (DFn, DFd)	P value
Treatment (between columns)	120816	3	40272	F (3, 12) = 12.23	P=0.0006
Residual (within columns)	39504	12	3292
Total	160320	15
Data summary
Number of treatments (columns)	4
Number of values (total)	16

## Sheet: Fig6
0 mM KNO3	1 mM KNO3	10 mM KNO3				Time (days)					KCl	NH4Cl	Gln	KNO3	NH4NO3
0.3	2.18	6.13				3	0.03	0.04	0.03	0.03	0.02	0.04	0.03	6.54	3.33
0.06	2.37	4.51				4	0.93	0.99	0.95	1.04	0.04	0.04	0.02	3.88	2.97
0.05	2.1	3.97				5	1.86	2.48	2.89	2.82	0.03	0.02	0.03	4.22	2.8
0.03	2.45	7.12				6	3.82	3.93	3.73	3.4	0.02	0.02	0.05	3.02	2.18
Table Analyzed	Dynamic Range					7	3.93	5.3	7.79	4.96	Table Analyzed	Specificity
Data sets analyzed	A-C					8	3.42	3.22	4.13	3.52	Data sets analyzed	A-E
						9	1.87	1.22	2.47	2.62
ANOVA summary											ANOVA summary
F	39.97										F	33.52
P value	<0.0001										P value	<0.0001
P value summary	****										P value summary	****
Significant diff. among means (P < 0.05)?	Yes										Significant diff. among means (P < 0.05)?	Yes
R squared	0.8988										R squared	0.8994
Brown-Forsythe test											Brown-Forsythe test
F (DFn, DFd)	19.48 (2, 9)										F (DFn, DFd)	2.683 (4, 15)
P value	0.0005										P value	0.0721
P value summary	***										P value summary	ns
Are SDs significantly different (P < 0.05)?	Yes										Are SDs significantly different (P < 0.05)?	No
Bartlett's test											Bartlett's test
Bartlett's statistic (corrected)	15.71										Bartlett's statistic (corrected)	63.9
P value	0.0004										P value	<0.0001
P value summary	***										P value summary	****
Are SDs significantly different (P < 0.05)?	Yes										Are SDs significantly different (P < 0.05)?	Yes
ANOVA table	SS	DF	MS	F (DFn, DFd)	P value						ANOVA table	SS	DF	MS	F (DFn, DFd)	P value
Treatment (between columns)	57.31	2	28.66	F (2, 9) = 39.97	P<0.0001						Treatment (between columns)	66.86	4	16.72	F (4, 15) = 33.52	P<0.0001
Residual (within columns)	6.452	9	0.7169								Residual (within columns)	7.48	15	0.4986
Total	63.77	11									Total	74.34	19
Data summary											Data summary
Number of treatments (columns)	3										Number of treatments (columns)	5
Number of values (total)	12										Number of values (total)	20

## Sheet: Sup Fig3
Vac 2min	Vac 5min	Vac 8min				Son 10s	Son 20s	Son 40s				Mock	Vac 2min	Vac 5min	Vac 8min			Mock	Son 10s	Son 20s	Son 40s
174.85	91.77	65.8				266.87	200.85	225.97				0.27	0.42	0.26	0.38			0.27	0.38	0.33	0.4
156.5	116.97	103.25				280.14	232.32	198.09				0.22	0.41	0.28	0.3			0.22	0.48	0.42	0.42
111.43	116.16	116.97				207.94	243.88	372.22				0.3	0.41	0.48	0.22			0.3	0.38	0.33	0.36
Table Analyzed	VT8 YPET					266.87	213.78	135.3				Table Analyzed	VT8 PR1						0.34	0.34	0.41
Data sets analyzed	A-C					Table Analyzed	VT9 YPET					Data sets analyzed	A-D					Table Analyzed	VT9 PR1
Distribution assumption	Normal (Gaussian)					Data sets analyzed	A-C											Data sets analyzed	A-D
						Distribution assumption	Normal (Gaussian)					ANOVA summary
ANOVA summary												F	2.167					ANOVA summary
F	3.38					ANOVA summary						P value	0.1699					F	6.515
P value	0.104					F	0.2937					P value summary	ns					P value	0.0085
P value summary	ns					P value	0.7524					Significant diff. among means (P < 0.05)?	No					P value summary	**
Significant diff. among means (P < 0.05)?	No					P value summary	ns					R squared	0.4483					Significant diff. among means (P < 0.05)?	Yes
R squared	0.5298					Significant diff. among means (P < 0.05)?	No											R squared	0.6399
						R squared	0.06128					Brown-Forsythe test
Brown-Forsythe test												F (DFn, DFd)	0.7522 (3, 8)					Brown-Forsythe test
F (DFn, DFd)	0.3578 (2, 6)					Brown-Forsythe test						P value	0.5512					F (DFn, DFd)	0.1638 (3, 11)
P value	0.7132					F (DFn, DFd)	1.742 (2, 9)					P value summary	ns					P value	0.9185
P value summary	ns					P value	0.2294					Are SDs significantly different (P < 0.05)?	No					P value summary	ns
Are SDs significantly different (P < 0.05)?	No					P value summary	ns											Are SDs significantly different (P < 0.05)?	No
						Are SDs significantly different (P < 0.05)?	No					Bartlett's test
Bartlett's test												Bartlett's statistic (corrected)						Bartlett's test
Bartlett's statistic (corrected)						Bartlett's test						P value						Bartlett's statistic (corrected)
P value						Bartlett's statistic (corrected)	6.999					P value summary						P value
P value summary						P value	0.0302					Are SDs significantly different (P < 0.05)?						P value summary
Are SDs significantly different (P < 0.05)?						P value summary	*											Are SDs significantly different (P < 0.05)?
						Are SDs significantly different (P < 0.05)?	Yes					ANOVA table	SS	DF	MS	F (DFn, DFd)	P value
ANOVA table	SS	DF	MS	F (DFn, DFd)	P value							Treatment (between columns)	0.03716	3	0.01239	F (3, 8) = 2.167	P=0.1699	ANOVA table	SS	DF	MS	F (DFn, DFd)	P value
Treatment (between columns)	4442	2	2221	F (2, 6) = 3.380	P=0.1040	ANOVA table	SS	DF	MS	F (DFn, DFd)	P value	Residual (within columns)	0.04573	8	0.005717			Treatment (between columns)	0.03863	3	0.01288	F (3, 11) = 6.515	P=0.0085
Residual (within columns)	3943	6	657.2			Treatment (between columns)	2247	2	1123	F (2, 9) = 0.2937	P=0.7524	Total	0.08289	11				Residual (within columns)	0.02174	11	0.001977
Total	8386	8				Residual (within columns)	34421	9	3825									Total	0.06037	14
						Total	36668	11				Data summary
Data summary												Number of treatments (columns)	4					Data summary
Number of treatments (columns)	3					Data summary						Number of values (total)	12					Number of treatments (columns)	4
Number of values (total)	9					Number of treatments (columns)	3											Number of values (total)	15
						Number of values (total)	12

## Sheet: Sup Fig8
Mock										VAST										Fast-TrACC										AGROBEST
237.7	41.7	118.6	12.5	136.3	3.8	215.8	0.5	54.9		1040.4	612.7	680.2	885.6	279.1	742	137	271.4	255	738	3064.7	2373.4	2493.3	1509.4	1311.6						2427.9	4069.2	1752.8	1423.9	1970.9	1548.1
Table Analyzed	dab all
Data sets analyzed	A-D
Distribution assumption	Normal (Gaussian)
ANOVA summary
F	27.08
P value	<0.0001
P value summary	****
Significant diff. among means (P < 0.05)?	Yes
R squared	0.7576
Brown-Forsythe test
F (DFn, DFd)	2.809 (3, 26)
P value	0.0593
P value summary	ns
Are SDs significantly different (P < 0.05)?	No
Bartlett's test
Bartlett's statistic (corrected)	29.16
P value	<0.0001
P value summary	****
Are SDs significantly different (P < 0.05)?	Yes
ANOVA table	SS	DF	MS	F (DFn, DFd)	P value
Treatment (between columns)	24566369	3	8188790	F (3, 26) = 27.08	P<0.0001
Residual (within columns)	7861747	26	302375
Total	32428116	29
Data summary
Number of treatments (columns)	4
Number of values (total)	30

## Sheet: Sup Fig9
VAST	AGROBEST	Fast-TrACC				VAST	AGROBEST	Fast-TrACC	Mock
4.544	0.035	0.206				0	0.16	0.28	0.01
2.471	0.013	0.221				0	0.16	0.23	0.01
3.037	0.022	0.501				0	0.25	0.23	0
2.475						0	0.16	0.28	0.01
Table Analyzed	YPET Time2					Table Analyzed	ADH Time2
Data sets analyzed	A-C					Data sets analyzed	A-D
ANOVA summary						ANOVA summary
F	25.38					F	90.42
P value	0.0006					P value	<0.0001
P value summary	***					P value summary	****
Significant diff. among means (P < 0.05)?	Yes					Significant diff. among means (P < 0.05)?	Yes
R squared	0.8788					R squared	0.9576
Brown-Forsythe test						Brown-Forsythe test
F (DFn, DFd)	1.787 (2, 7)					F (DFn, DFd)	1.333 (3, 12)
P value	0.236					P value	0.3096
P value summary	ns					P value summary	ns
Are SDs significantly different (P < 0.05)?	No					Are SDs significantly different (P < 0.05)?	No
Bartlett's test						Bartlett's test
Bartlett's statistic (corrected)						Bartlett's statistic (corrected)
P value						P value
P value summary						P value summary
Are SDs significantly different (P < 0.05)?						Are SDs significantly different (P < 0.05)?
ANOVA table	SS	DF	MS	F (DFn, DFd)	P value	ANOVA table	SS	DF	MS	F (DFn, DFd)	P value
Treatment (between columns)	21.23	2	10.61	F (2, 7) = 25.38	P=0.0006	Treatment (between columns)	0.1955	3	0.06518	F (3, 12) = 90.42	P<0.0001
Residual (within columns)	2.927	7	0.4181			Residual (within columns)	0.00865	12	0.0007208
Total	24.15	9				Total	0.2042	15
Data summary						Data summary
Number of treatments (columns)	3					Number of treatments (columns)	4
Number of values (total)	10					Number of values (total)	16

## Sheet: Sup Fig11
Mock																									GV3101
0	0	0	0	0	0	0	0	0	0																51.5404	67.07	30.3243	50.5966	38.1222	51.57	53.71	49.5	43.72	63.26	40.55	38.43	43.42	36.82	94.77	88.94	91.9	94.82
					Mock												GV3101												C58C1
					0	0	0	0	0	0	0	0	0	0			8.82353	6.89655	17.7515	18.0124	13.4615	41.18	30.19	50.75	57.83	67.42	64.71	65.89	40.8511	26.0586	70.9677	48.2353	89.375	14.2322	14.5594	40.8397
[truncated: 22 more columns]

## Sheet: Sup Fig15
AGL1	EHA105		Mock	AGL1	EHA105					Mock																						EHA105
637.73	51.87		0.23	0.84	1.76					0	0	0	0	0	0	0	0	0	0	0	0											0.804424	1.63511	1.64918	0.726257	1.06516
798.58	58.41		0.59	0.78	1.19
1144.5	39.32		0.7	0.94	0.61
762.63			0.8	0.76	0.47
Table Analyzed	VT3 YPET		Table Analyzed	VT3 SiCAT
			Data sets analyzed	A-C
Column B	EHA105		Distribution assumption	Normal (Gaussian)
vs.	vs.
Column A	AGL1		ANOVA summary
			F	1.327
Unpaired t test			P value	0.3126
P value	0.0017		P value summary	ns
P value summary	**		Significant diff. among means (P < 0.05)?	No
Significantly different (P < 0.05)?	Yes		R squared	0.2277
One- or two-tailed P value?	Two-tailed
t, df	t=6.118, df=5		Brown-Forsythe test
			F (DFn, DFd)	5.129 (2, 9)
How large is the effect?			P value	0.0326
Mean of column A	835.9		P value summary	*
Mean of column B	49.87		Are SDs significantly different (P < 0.05)?	Yes
Difference between means (B - A) ± SEM	-786.0 ± 128.5
95% confidence interval	-1116 to -455.8		Bartlett's test
R squared (eta squared)	0.8822		Bartlett's statistic (corrected)	7.706
			P value	0.0212
F test to compare variances			P value summary	*
F, DFn, Dfd	500.3, 3, 2		Are SDs significantly different (P < 0.05)?	Yes
P value	0.004
P value summary	**		ANOVA table	SS	DF	MS	F (DFn, DFd)	P value
Significantly different (P < 0.05)?	Yes		Treatment (between columns)	0.369	2	0.1845	F (2, 9) = 1.327	P=0.3126
			Residual (within columns)	1.251	9	0.1391
Data analyzed			Total	1.62	11
Sample size, column A	4
Sample size, column B	3		Data summary
			Number of treatments (columns)	3
			Number of values (total)	12

## Sheet: Sup Fig16
Time (hours)
3	0.02	0.04	0.02	0.02
4	0.57	0.57	0.57	0.57
5	0.01	0.02	0.05	0.04
6	0.05	0.06	0.03	0.08
